# Supplementary material
Source: HighWire-hosted journal article supplement (https://bmjopen.bmj.com/content/15/5/e095738)
Supplement: inline-supplementary-material-2 [file inline-supplementary-material-2.pdf]

APPENDIX B, INTERVIEW QUESTIONS

| Theme                        | Question                                                                                                                                                                                                                                                                     |
|------------------------------|------------------------------------------------------------------------------------------------------------------------------------------------------------------------------------------------------------------------------------------------------------------------------|
| Decision making process      | Can you describe the process of making the choice for palliative treatment?<br>Clarification 1: So how did the choice go?<br>Clarification 2: So how did you decide?                                                                                                         |
| Decision making process      | How would you rate the process of making the choice for palliative treatment?<br>Clarification 1: not the treatment but the making of the decision?<br>Clarification 2: How did you feel about making the decision?                                                          |
| Pain                         | Can you describe the process since the decision in terms of pain?<br>Clarification: So how did the pain go during treatment?                                                                                                                                                 |
| Pain                         | How often did _____ appear to have her/his pain under control?                                                                                                                                                                                                               |
| Pain                         | How would you rate this aspect of _____'s dying experience?                                                                                                                                                                                                                  |
| Patient-relative interaction | Can you describe the interaction between _____ and his/her loved ones?<br>Clarification: How was the contact between _____ and the people around him/her?                                                                                                                    |
| Patient-relative interaction | How often did _____ spend time with family and friends?                                                                                                                                                                                                                      |
| Patient-relative interaction | How would you rate this aspect of _____'s dying experience?                                                                                                                                                                                                                  |
| Patient-relative interaction | Was _____ touched or hugged by her/his loved ones?                                                                                                                                                                                                                           |
| Patient-relative interaction | How would you rate this aspect of _____'s dying experience?                                                                                                                                                                                                                  |
| Dying process                | How often did _____ appear to keep her/his dignity and self-respect?                                                                                                                                                                                                         |
| Dying process                | How would you rate this aspect of _____'s dying experience?                                                                                                                                                                                                                  |
| Patient-relative interaction | Did _____ say goodbye to loved ones?                                                                                                                                                                                                                                         |
| Patient-relative interaction | How would you rate this aspect of _____'s dying experience?                                                                                                                                                                                                                  |
| Dying process                | Please describe the dying process?                                                                                                                                                                                                                                           |
| Dying process                | How often did _____ breathe comfortably?                                                                                                                                                                                                                                     |
| Dying process                | How would you rate this aspect of _____'s dying experience?                                                                                                                                                                                                                  |
| Dying process                | How often did _____ appear to feel at peace with dying?                                                                                                                                                                                                                      |
| Dying process                | How would you rate this aspect of _____'s dying experience?                                                                                                                                                                                                                  |
| In depth                     | Do you think that the patient would choose non operative management with PENG block again if he/she would have to make the decision a second time?<br>Clarification: how do you look back on the choice for non operative management with PENG block with today's knowledge? |
